# Supplementary material for: Geochemical Evolution in Historical Time of Thermal Mineral Springs at Campetti Southwest (Veii, Central Italy) through Geoarcheological Investigation
Source: MDPI journal article supplement (doi:10.3390/w16081113), 2024-04-13
Supplement: s1 [file s1]

*Supplementary materials*

# Geochemical Evolution in Historical Time of Thermal Mineral Springs at Campetti Southwest (Veii, Central Italy) through Geoarcheological Investigation

Stefano Viaroli <sup>1,\*</sup>, Tiziano Latini <sup>2,3</sup>, Emilio Cuoco <sup>4</sup>, Angela Mormone <sup>4</sup>, Monica Piochi <sup>4</sup> and Matteo Maggi <sup>5</sup>

<sup>1</sup> Department of Earth Sciences, University of Pisa, 56126 Pisa, Italy

<sup>2</sup> Department of Antiquities, Sapienza University of Rome, Piazzale Aldo Moro 5, 00185 Rome, Italy; tiziano.latini@uniroma1.it

<sup>3</sup> MiC—Ministry of Culture, Via del Collegio Romano 27, 00186 Rome, Italy

<sup>4</sup> Istituto Nazionale di Geofisica e Vulcanologia, Osservatorio Vesuviano, Via Diocleziano 328, 80124 Naples, Italy; emilio.cuoco@ingv.it (E.C.); angela.mormone@ingv.it (A.M.); monica.piochi@ingv.it (M.P.)

<sup>5</sup> Istituto Superiore per la Protezione e la Ricerca Ambientale (ISPRA), 00144 Roma, Italy; matteo.maggi@isprambiente.it

\* Correspondence: stefano.viaroli@unipi.it

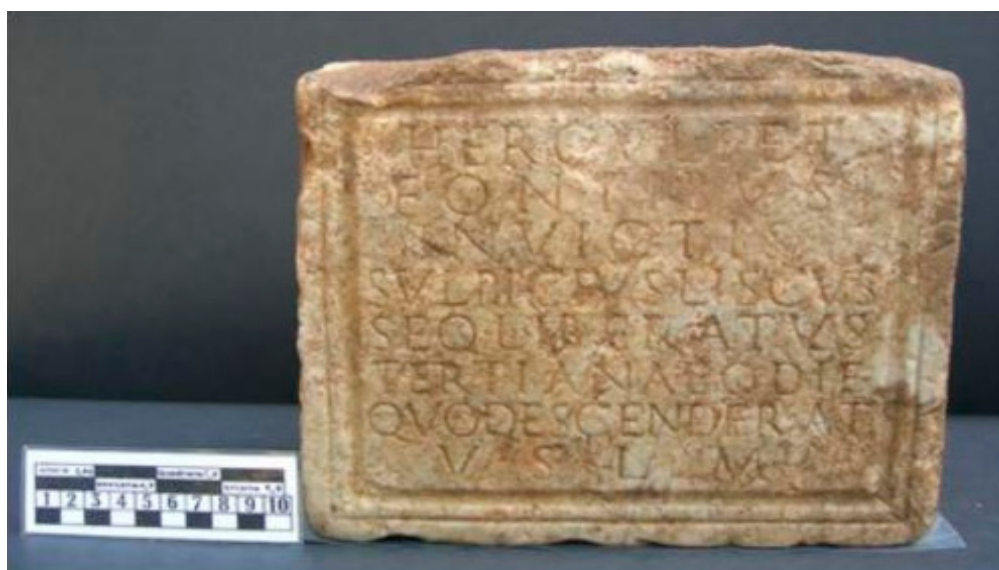

**Figure S1.** Votive inscription to Hercules and the Springs found in Veii Campetti Southwest site (modified from[1]).

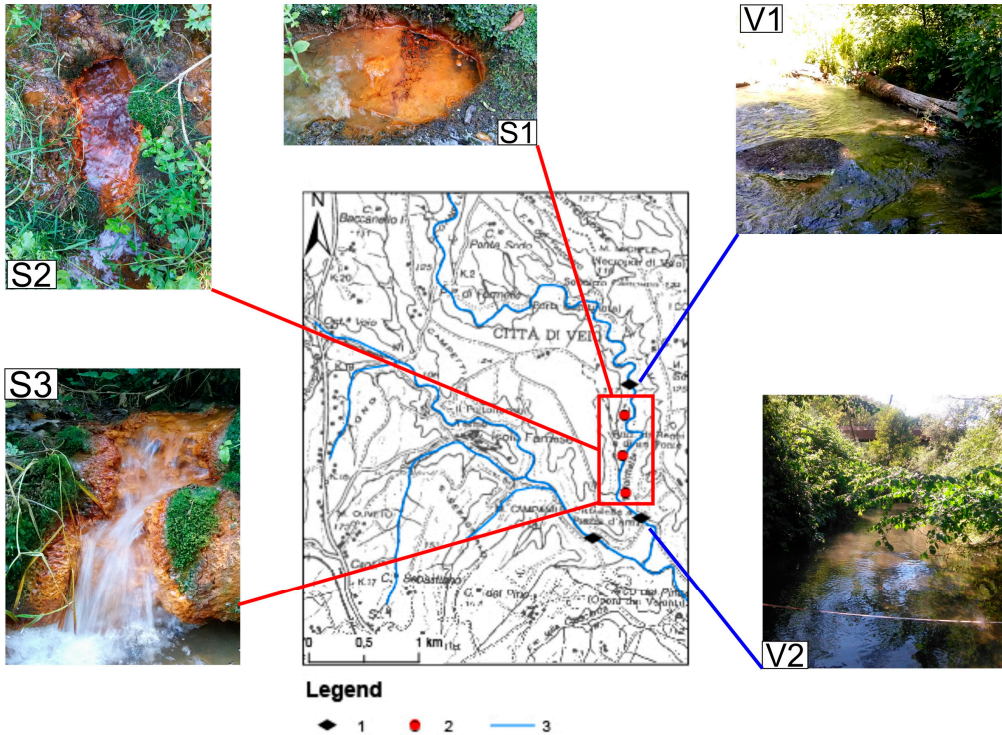

**Figure S2.** Pictures and locations of the studied springs and the discharge measurements along the Valchetta River. Legend: (1) Discharge measurements; (2) Thermal-mineral springs; (3) Streams.

**Table S1.** Chemical composition of water sampled in the southeastern sector of Sabatini Volcanic District. \*[2]; \*\*[3]; n.a. not analyzed.

| ID    | Type   | T<br>°C | pH  | TDS<br>g/L | HCO <sub>3</sub> <sup>-</sup><br>mg/L | F <sup>-</sup><br>mg/L | Cl <sup>-</sup><br>mg/L | NO <sub>3</sub> <sup>-</sup><br>mg/L | SO <sub>4</sub> <sup>2-</sup><br>mg/L | Na <sup>+</sup><br>mg/L | K <sup>+</sup><br>mg/L | Mg <sup>2+</sup><br>mg/L | Ca <sup>2+</sup><br>mg/L |
|-------|--------|---------|-----|------------|---------------------------------------|------------------------|-------------------------|--------------------------------------|---------------------------------------|-------------------------|------------------------|--------------------------|--------------------------|
| 64*   | Spring | 23      | 6.6 | 1393       | 598                                   | n.a.                   | 107                     | n.a.                                 | 211                                   | 87                      | 122                    | 21                       | 154                      |
| 65*   | Spring | 29      | 6   | 3671       | 1281                                  | n.a.                   | 231                     | n.a.                                 | 955                                   | 239                     | 321                    | 72                       | 450                      |
| 66*   | River  | 19      | 7.8 | 1311       | 537                                   | n.a.                   | 73                      | n.a.                                 | 283                                   | 76                      | 99                     | 16                       | 166                      |
| 67*   | Spring | 23      | 6.9 | 1087       | 461                                   | n.a.                   | 62                      | n.a.                                 | 202                                   | 62                      | 95                     | 14                       | 124                      |
| 68*   | River  | 18      | 7.6 | 552        | 299                                   | n.a.                   | 42                      | n.a.                                 | 26                                    | 37                      | 28                     | 9                        | 66                       |
| 69*   | Spring | 32      | 7   | 3621       | 1647                                  | n.a.                   | 415                     | n.a.                                 | 394                                   | 294                     | 386                    | 48                       | 340                      |
| 83**  | Spring | 17      | 7.1 | 407        | 177                                   | 0.3                    | 26                      | 41                                   | 23                                    | 30                      | 17                     | 14                       | 39                       |
| 84**  | Well   | 14      | 6.9 | 2564       | 1708                                  | 0.2                    | 74                      | 1                                    | 13                                    | 116                     | 347                    | 57                       | 193                      |
| 90**  | Well   | 25      | 6.6 | 1195       | 555                                   | 2.7                    | 78                      | 7                                    | 158                                   | 74                      | 120                    | 18                       | 134                      |
| 102** | Spring | 27      | 6.2 | 3041       | 1470                                  | 2.3                    | 142                     | 1                                    | 486                                   | 189                     | 289                    | 62                       | 340                      |
| 161** | Well   | 11      | 7.2 | 419        | 226                                   | 0.7                    | 21                      | 22                                   | 17                                    | 33                      | 11                     | 12                       | 43                       |
| 165** | Well   | 18      | 7.5 | 469        | 293                                   | 0.6                    | 22                      | 0                                    | 22                                    | 28                      | 16                     | 12                       | 57                       |

**Table S2.** Chemical composition of rock samples.

|                                    | FR   | XX   | ON   | TB   | TG   | TV   |           | FR  | XX  | ON   | TB   | TG  | TV  |
|------------------------------------|------|------|------|------|------|------|-----------|-----|-----|------|------|-----|-----|
|                                    | wt%  | wt%  | wt%  | wt%  | wt%  | wt%  |           | ppm | ppm | ppm  | ppm  | ppm | ppm |
| <b>CaCO<sub>3</sub></b>            | 52.6 | 68.5 | nd   | 63.5 | 97.1 | 93.3 | <b>Ti</b> | 55  | 634 | 1218 | 1182 | 0   | 93  |
| <b>CaO</b>                         | -    | -    | 28   | -    | -    | -    | <b>V</b>  | 0   | 70  | 256  | 52   | 0   | 0   |
| <b>Na<sub>2</sub>O</b>             | 0.07 | 0.25 | 0.82 | 0.28 | 0.35 | 0.04 | <b>Cr</b> | 5   | 9   | 22   | 27   | 5   | 7   |
| <b>MgO</b>                         | 0.68 | 1.98 | 0.46 | 2.32 | 0.74 | 0.28 | <b>Co</b> | 0   | 7   | 18   | 6    | 0   | 0   |
| <b>K<sub>2</sub>O</b>              | 0.36 | 1.74 | 3.18 | 2.06 | 0.64 | 0.19 | <b>Ni</b> | 5   | 2   | 17   | 10   | 0   | 8   |
| <b>SiO<sub>2</sub></b>             | 6.93 | 15.1 | 30.9 | 21.5 | 1.9  | 3.68 | <b>Cu</b> | 0   | 3   | 24   | 5    | 0   | 0   |
| <b>Al<sub>2</sub>O<sub>3</sub></b> | 0    | 0.11 | 6.14 | 0.21 | 0    | 0.08 | <b>Zn</b> | 18  | 22  | 52   | 20   | 0   | 0   |
| <b>MnO</b>                         | 0.69 | 0.53 | 1.86 | 0.14 | 0    | 0.64 | <b>As</b> | 784 | 15  | 496  | 12   | 22  | 5   |
| <b>Fe(OH)<sub>3</sub></b>          | 41.7 | 10.8 | 31.8 | 4.42 | 0    | 0.29 | <b>Rb</b> | 9   | 98  | 69   | 110  | 7   | 15  |
| <b>Total</b>                       | 103  | 98.9 | 103  | 94.5 | 101  | 98.5 | <b>Sr</b> | 751 | 969 | 382  | 1091 | 314 | 14  |
|                                    |      |      |      |      |      |      | <b>Zr</b> | 0   | 18  | 328  | 26   | 0   | 0   |
|                                    |      |      |      |      |      |      | <b>Nb</b> | 0   | 0   | 25   | 6    | 0   | 0   |
|                                    |      |      |      |      |      |      | <b>Mo</b> | 0   | 0   | 19   | 0    | 0   | 0   |
|                                    |      |      |      |      |      |      | <b>Te</b> | 6   | 5   | 15   | 8    | 4   | 6   |
|                                    |      |      |      |      |      |      | <b>Cs</b> | 1   | 6   | 11   | 9    | 1   | 2   |
|                                    |      |      |      |      |      |      | <b>Ba</b> | 43  | 412 | 1016 | 348  | 7   | 168 |
|                                    |      |      |      |      |      |      | <b>Pb</b> | 16  | 10  | 69   | 21   | 0   | 0   |
|                                    |      |      |      |      |      |      | <b>U</b>  | 1   | 2   | 25   | 3    | 0   | 3   |

## References

1. Fusco, U. The Thermo-Mineral Springs at Veii (RM) and Its Territory: New Discoveries and Old Excavations. In *Rethinking the Concept of 'Healing Settlements': Water, Cults, Constructions and Contexts in the Ancient World*; Archaeopress Roman Archeology: Rome, 2019; Vol. 52, pp. 21–35.
2. Dall'Aglia, M.; Duchi, V.; Minissale, A.; Guerrini, A.; Tremori, M. Hydrogeochemistry of the Volcanic District in the Tolfa and Sabatini Mountains in Central Italy. *J Hydrol (Amst)* **1994**, *154*, 195–217, doi:10.1016/0022-1694(94)90217-8.
3. Cinti, D.; Tassi, F.; Procesi, M.; Brusca, L.; Cabassi, J.; Capecchiacci, F.; Delgado Huertas, A.; Galli, G.; Grassa, F.; Vaselli, O.; et al. Geochemistry of Hydrothermal Fluids from the Eastern Sector of the Sabatini Volcanic District (Central Italy). *Applied Geochemistry* **2017**, *84*, 187–201, doi:10.1016/j.apgeochem.2017.06.014.
